# Supplementary material for: Facile synthesis, aggregation-induced emission, mechano- and thermochromism of o-carborane–tetraphenylethene dyads with a short CH(OH) linker
Source: Royal Society of Chemistry journal article supplement (doi:10.1039/d3nj03431c), 2023-01-01
Supplement: d3nj03431c1.pdf [file d3nj03431c1.pdf]

## Supplementary Information

### Facile synthesis, aggregation-induced emission, mechano- and thermochromism of *o*-carborane-tetraphenylethene dyads with a short CH(OH) linker

Tianrui Li<sup>a,b</sup>, Hao Zhang<sup>b</sup>, Jinling Miao<sup>\*b</sup>, Chunyue Xu<sup>a</sup>, Yong Nie<sup>\*a</sup>, Guangning Liu<sup>b</sup>, Guoxin Sun<sup>\*b</sup>, Xuchuan Jiang<sup>a,c</sup>

<sup>a</sup> Institute for Smart Materials & Engineering, University of Jinan, No. 336 Nanxin Zhuang West Road, 250022 Jinan, P. R. China

<sup>b</sup> School of Chemistry and Chemical Engineering, University of Jinan, Shandong Provincial Key Laboratory of Fluorine Chemistry and Chemical Materials, No. 336 Nanxin Zhuang West Road, 250022 Jinan, P. R. China

<sup>c</sup> School of Materials Science and Engineering, University of Jinan, Jinan 250022

### Table of contents

Experimental section

Table S1. Photophysical data for the parent TPE

Scheme S1 Molecular structures of reported *o*-carborane-TPE compounds

Table S2. Synthesis and photophysical data for reported *o*-carborane-TPE compounds

Table S3 Crystal data and structure refinement for **1** and **2**

Table S4 Selected bond lengths and angles, and torsion angles for **1** and **2**

Fig. S1 CIE 1931 chromaticity coordinates of **1** (a), **2** (b), **3** (c), **4** (d)

Fig. S2 PXRD patterns of **1** (a), **2** (b), **3** (c), **4** (d)

Fig S3. FT-IR spectrum of **1** (KBr pellet)

Fig S4. <sup>1</sup>H-NMR spectrum of **1** in CDCl<sub>3</sub>

Fig S5. <sup>13</sup>C-NMR spectrum of **1** in CDCl<sub>3</sub>

Fig S6. <sup>11</sup>B{<sup>1</sup>H}-NMR spectrum of **1** in CH<sub>2</sub>Cl<sub>2</sub>

FigS7. FT-IR spectrum of **2** (KBr pellet)

Fig S8. <sup>1</sup>H-NMR spectrum of **2** in CDCl<sub>3</sub>

Fig S9. <sup>13</sup>C-NMR spectrum of **2** in CDCl<sub>3</sub>

Fig S10. <sup>11</sup>B{<sup>1</sup>H}-NMR spectrum of **2** in CH<sub>2</sub>Cl<sub>2</sub>

Fig S11. <sup>19</sup>F-NMR spectrum of **2** in CH<sub>2</sub>Cl<sub>2</sub>

Fig S12. FT-IR spectrum of **3** (KBr pellet)

Fig S13. <sup>1</sup>H-NMR spectrum of **3** in CDCl<sub>3</sub>

Fig S14. <sup>13</sup>C-NMR spectrum of **3** in CDCl<sub>3</sub>

Fig S15. <sup>11</sup>B{<sup>1</sup>H}-NMR spectrum of **3** in CH<sub>2</sub>Cl<sub>2</sub>

FigS16. FT-IR spectrum of **4** (KBr pellet)

Fig S17. <sup>1</sup>H-NMR spectrum of **4** in CDCl<sub>3</sub>

Fig S18. <sup>13</sup>C-NMR spectrum of **4** in CDCl<sub>3</sub>

Fig S19. <sup>11</sup>B{<sup>1</sup>H}-NMR spectrum of **4** in CH<sub>2</sub>Cl<sub>2</sub>

Fig S20. <sup>19</sup>F-NMR spectrum of **4** in CH<sub>2</sub>Cl<sub>2</sub>

## Experimental section

### General

Standard Schlenk techniques were used for the synthetic reactions under Ar. Tetrahydrofuran (THF) was dried with sodium-benzophenone, and other solvents were commercially available and used without further purification. IR spectra were recorded in the range 400-4000  $\text{cm}^{-1}$  on a Perkin Elmer Spectrum RX I spectrometer using KBr pellets.  $^1\text{H}$ -NMR analyses were performed on a Bruker Avance III 600 MHz and 400 MHz spectrometer.  $^{19}\text{F}$ -NMR and  $^{11}\text{B}\{^1\text{H}\}$ -NMR spectra were recorded in dichloromethane solutions ( $\text{D}_2\text{O}$  was added for locking) on a Bruker AVANCE III 500 spectrometer. As internal references for  $^1\text{H}$ - and  $^{13}\text{C}$ -NMR spectroscopy the signals of  $\text{CDCl}_3$  were used and calculated relative to tetramethylsilane (TMS). Melting points were measured with a SGW X-4 apparatus and were not corrected. The high resolution mass spectra were measured on a Thermo Fisher Scientific LTQ FTICR-MS instrument (DART positive ion mode) and Waters Micromass GCT Premier (EI (70eV)). UV-Vis spectra were recorded on a UV3600 Plus spectrometer. Emission spectra were measured on an Edinburgh FLS920 fluorimeter, using a front-face sample configuration for solid samples. Absolute fluorescence quantum yields were obtained using an integrating sphere. For the variable temperature emission spectra of the powder samples, a temperature controller (TCB1402C) made by Techcomp company was applied, and for the silica gel composites on TLC plates, a hot plate was used to heat up the TLC plates and the emission spectra were then measured as soon as possible.

### Synthesis of compound 1

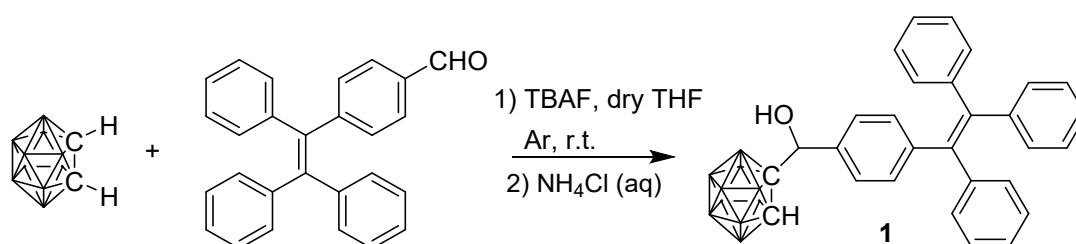

Under argon, *o*-carborane (77.1 mg, 0.54 mmol), 1-(4-formylphenyl)-1,2,2-triphenylethene (217.4 mg, 0.60 mmol) and 20 mL of dry THF were added into a Schlenk tube. To the mixture a THF solution of tetrabutylammonium fluoride ( $1 \text{ mol}\cdot\text{L}^{-1}$ , 1.6 mL, 1.6 mmol) was added dropwise via syringe under stirring and reacted for 1 h at room temperature. Then the reaction mixture was quenched by 15 mL of an aqueous solution of saturated ammonium chloride and stirred for additional 10 min before it was transferred to a separation funnel. The organic phase was separated, and the water phase was extracted with  $\text{CH}_2\text{Cl}_2$  ( $15 \text{ mL} \times 3$ ). The organic phases were combined and dried with anhydrous  $\text{Na}_2\text{SO}_4$ , concentrated and separated using preparative thin

layer chromatography (eluent  $\text{CH}_2\text{Cl}_2/n\text{-hexane} = 1/2$ ,  $V/V$ ) to give a yellowish solid (compound **1**, 134.2 mg, yield 50.3%), *m.p.* 176.8-177.3 °C;  $R_f = 0.1$  ( $\text{CH}_2\text{Cl}_2/n\text{-hexane} = 1/2$ ,  $V/V$ ); FT-IR (KBr,  $\text{v}/\text{cm}^{-1}$ ): 3065, 2924, 2583 (B-H), 1604, 1490, 1078, 702;  $^1\text{H}$  NMR (400 MHz,  $\text{CDCl}_3$ ):  $\delta$  7.16 - 6.93 (m, 19H, Ar-H), 5.16 (s, 1H, CHOH), 3.63 (s, 1H,  $\text{C}_{\text{cage-H}}$ ), 2.58 (s, 1H, OH);  $^{13}\text{C}$  NMR (151 MHz,  $\text{CDCl}_3$ )  $\delta$  145.67, 143.39, 143.10, 142.94, 142.17, 140.02, 136.25, 131.60, 131.36, 131.26, 131.22, 127.89, 127.76 (d,  $J = 3.17$  Hz), 127.75, 126.81, 126.77 (d,  $J = 1.87$  Hz), 125.88, 78.69, 74.84, 59.36;  $^{11}\text{B}\{^1\text{H}\}$  NMR (128 MHz,  $\text{CH}_2\text{Cl}_2$ )  $\delta$  -3.73 (2B), -4.65 (1B), -9.05 (1B), -9.52 (1B), -11.28 (1B), -12.63 (2B), -13.27 (1B), -14.20 (1B); DART-HRMS  $m/z$  (%): calcd. for  $\text{C}_{29}\text{H}_{31}\text{B}_{10}\text{O}$ , 505.3305, found 505.3350  $[\text{M}+\text{H}]^+$ .

### Synthesis of compound **2**

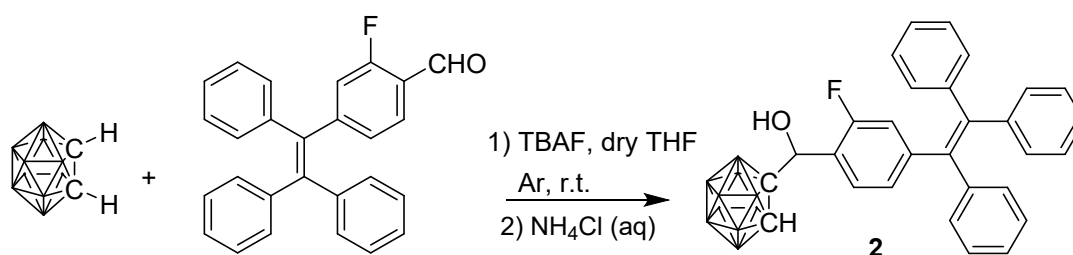

Under argon, *o*-carborane (77.1 mg, 0.54 mmol), 1-(3-fluoro-4-formylphenyl)-1,2,2-triphenylethene (226.8 mg, 0.60 mmol) and 20 mL of dry THF were added into a Schlenk tube. To the mixture a THF solution of tetrabutylammonium fluoride ( $1 \text{ mol}\cdot\text{L}^{-1}$ , 1.6 mL, 1.6 mmol) was added dropwise via syringe under stirring and reacted for 2 h at room temperature. Then reaction mixture was quenched by 15 mL of an aqueous solution of saturated ammonium chloride and stirred for additional 10 min before it was transferred to a separation funnel. The organic phase was separated, and the water phase was extracted with  $\text{CH}_2\text{Cl}_2$  ( $15 \text{ mL} \times 3$ ). The organic phases were combined and dried with anhydrous  $\text{Na}_2\text{SO}_4$ , concentrated and separated using preparative thin layer chromatography (eluent ethyl acetate/*n*-hexane = 1/5,  $V/V$ ) to give a yellowish solid (compound **2**, 127.5 mg, yield 49%); *m.p.* 161.2-162.1 °C,  $R_f = 0.48$  (ethyl acetate/*n*-hexane = 1/5,  $V/V$ ); FT-IR (KBr,  $\text{v}/\text{cm}^{-1}$ ): 3072, 2960, 2577 (B-H), 1612, 1413, 702;  $^1\text{H}$  NMR (600 MHz,  $\text{CDCl}_3$ )  $\delta$  7.21-7.05 (m, 10H, ArH), 7.5-7.00 (m, 4H, ArH), 6.99 (dd,  $J = 8.0, 1.4$  Hz, 2H, ArH), 6.87 (dd,  $J = 8.0, 1.5$  Hz, 1H, ArH), 6.74 (dd,  $J = 11.5, 1.4$  Hz, 1H, ArH), 5.47 (s, 1H, CHOH), 3.85 (s, 1H, cage-CH);  $^{13}\text{C}$  NMR (151 MHz,  $\text{CDCl}_3$ )  $\delta$  160.32, 158.03, 147.67, 147.62, 142.97 (d,  $J = 4.14\text{Hz}$ ), 142.79, 142.41, 138.88, 131.21, 131.16, 128.02, 127.94, 127.56 (d,  $J = 3.46\text{Hz}$ ), 127.16, 126.97, 126.82, 123.96, 123.88, 118.35, 118.21, 78.19, 68.96, 58.92, 29.75;  $^{11}\text{B}\{^1\text{H}\}$  NMR (128 MHz,  $\text{CH}_2\text{Cl}_2$ )  $\delta$  -3.60 (2B), -4.71 (1B), -9.19 (1B), -9.55 (1B), -12.23 (2B), -13.36 (1B), -13.81 (2B);  $^{19}\text{F}$  (377 MHz,  $\text{CH}_2\text{Cl}_2$ )  $\delta$  -118.01; DART-HRMS  $m/z$  (%): calcd. for  $\text{C}_{29}\text{H}_{31}\text{B}_{10}\text{O}_1\text{F}_1$ , 522.3362, found 522.3357  $[\text{M}+\text{H}]^+$ .

### Synthesis of compound 3

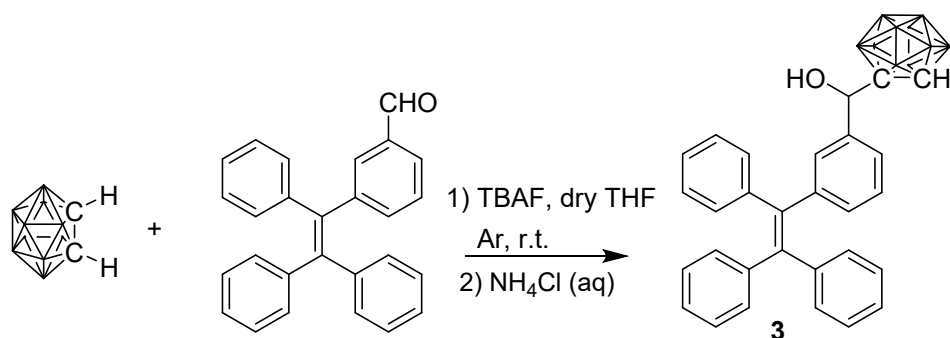

Under argon, *o*-carborane (145.2 mg, 1.0 mmol), 1-(3-formylphenyl)-1,2,2-triphenylethene (433.7 mg, 1.2 mmol) and 25 mL of dry THF were added into a Schlenk tube. To the mixture a THF solution of tetrabutylammonium fluoride (1 mol·L<sup>-1</sup>, 3 mL, 3 mmol) was added dropwise via syringe under stirring and reacted for 2 h at room temperature. Then reaction mixture was quenched by 15 mL of an aqueous solution of saturated ammonium chloride and stirred for additional 10 min before it was transferred to a separation funnel. The organic phase was separated, and the water phase was extracted with CH<sub>2</sub>Cl<sub>2</sub> (15 mL × 3). The organic phases were combined and dried with anhydrous Na<sub>2</sub>SO<sub>4</sub>, concentrated and separated using column chromatography (eluent ethyl acetate/*n*-hexane = 1/5, *V/V*) to give colorless oily liquid, which solidified to give a white solid in two days (compound **3**, 280.5 mg, yield 55.6%); *m.p.* 180.4–181.0 °C; *R<sub>f</sub>* = 0.31 (ethyl acetate/*n*-hexane = 1/5, *V/V*); FT-IR (KBr, *v*/cm<sup>-1</sup>): 3090, 3053, 3019, 2585 (B-H), 1491, 1441, 1072, 764, 700; <sup>1</sup>H NMR (600 MHz, CDCl<sub>3</sub>) δ 7.18–6.98 (m, 19 H), 5.07 (s, 1 H), 3.50 (s, 1 H), 2.38 (s, 1 H); <sup>13</sup>C NMR (151 MHz, CDCl<sub>3</sub>) δ 144.89, 143.46, 143.34, 143.27, 142.02, 140.14, 138.11, 132.68, 131.50, 131.37, 131.31, 129.37, 128.41, 128.10, 127.97, 127.88, 127.13, 126.86 (d, *J* = 4.05 Hz), 124.95, 78.55, 75.03, 59.15, 54.51; <sup>11</sup>B{<sup>1</sup>H} NMR (193 MHz, CDCl<sub>3</sub>) δ -2.32 (1B), -3.25 (1B), -4.33 (1B), -8.82 (1B), -9.26 (1B), -11.09 (1B), -12.89 (2B), -13.64 (1B), -14.78 (1B); DART-MS *m/z* (%): calcd. for C<sub>29</sub>H<sub>33</sub>B<sub>10</sub>O, 505.3529, found 505.3416 [M+H]<sup>+</sup>.

### Synthesis of compound 4

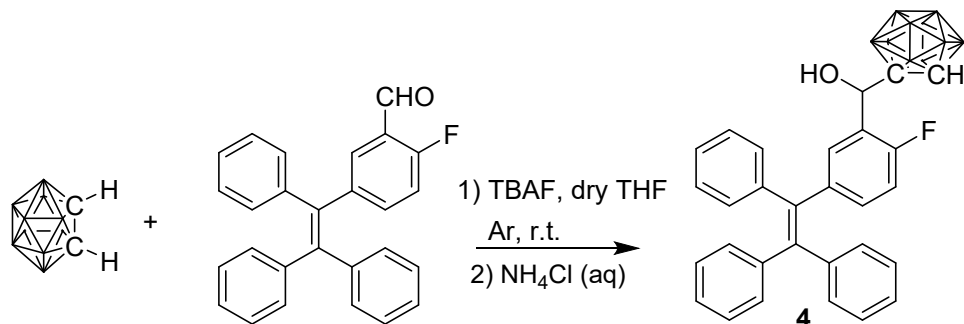

Under argon, *o*-carborane (145.2 mg, 1.0 mmol), 1-(4-fluoro-3-formylphenyl)-1,2,2-triphenylethene (433.7 mg, 1.2 mmol) and 25 mL of dry THF were added into a Schlenk tube. To the mixture a THF solution of tetrabutylammonium fluoride (1 mol·L<sup>-1</sup>, 3 mL, 3 mmol) was added

dropwise via syringe under stirring and reacted for 2 h at room temperature. Then reaction mixture was quenched by 15 mL of an aqueous solution of saturated ammonium chloride and stirred for additional 10 min before it was transferred to a separation funnel. The organic phase was separated, and the water phase was extracted with CH<sub>2</sub>Cl<sub>2</sub> (15 mL × 3). The organic phases were combined and dried with anhydrous Na<sub>2</sub>SO<sub>4</sub>, concentrated and separated using column chromatography (eluent ethyl acetate/*n*-hexane = 1/5, *V/V*) to give colorless oily liquid, which then solidified to afford a white solid in two days (compound **4**, 314 mg, yield 60.2%); *m.p.* 167.0-167.6 °C; *R<sub>f</sub>* = 0.35 (ethyl acetate/*n*-hexane = 1/5, *V/V*); FT-IR (KBr, *v/cm*<sup>-1</sup>): 3082, 3055, 3019, 2583 (B-H), 1493, 1256, 1041, 764, 698; <sup>1</sup>H NMR (600 MHz, CDCl<sub>3</sub>) δ 7.17 - 7.09 (m, 10 H), 7.04 - 6.99 (m, 7 H), 7.01 - 6.98 (m, 2 H), 6.85 (t, *J* = 9.26 Hz, 1H), 5.42 (s, 1 H), 3.58 (s, 1 H), 2.39 (s, 1 H); <sup>13</sup>C NMR (151 MHz, CDCl<sub>3</sub>) δ 159.04, 157.40, 143.31, 143.05, 142.88, 142.01, 140.70 (d, *J* = 4.35 Hz), 140.69, 139.14, 133.93, 133.88, 131.37, 131.19, 131.15, 130.35, 128.09, 127.91, 127.77, 127.05, 126.85, 126.80, 125.53, 125.45, 115.38, 115.23, 77.77, 68.70, 58.68; <sup>11</sup>B{<sup>1</sup>H} NMR (128 MHz, CH<sub>2</sub>Cl<sub>2</sub>) δ -2.94 (1B), -3.70 (2B), -4.88 (1B), -9.69 (2B), -12.51 (2B), -13.34 (1B), -13.90 (2B); <sup>19</sup>F NMR (377 MHz, CH<sub>2</sub>Cl<sub>2</sub>) δ -119.21; DART-MS *m/z* (%): calcd. for C<sub>29</sub>H<sub>32</sub>B<sub>10</sub>O<sub>F</sub>, 523.3435, found 523.3438 [M+H]<sup>+</sup>.

#### Preparation of the silica gel composites

The corresponding sample (5 mg) was dissolved in 5 mL of dichloromethane, the resulting solution was dropped (3 drops) on an analytical silica gel plate (1 × 1 cm), and the silica gel composites were obtained after being dried in air (1 min) and measured.

**Table S1.** Photophysical data for the parent TPE

| <sup>a</sup> $\lambda_{em}$ (nm) | <sup>a</sup> $\Phi$ | <sup>a</sup> $\tau$ (ns) | ref. in the text |
|----------------------------------|---------------------|--------------------------|------------------|
| 439                              | 0.23                | 1.44                     | 28               |
| 475 (amorphous)                  | 0.49 (film)         | -                        | 29               |
| 440 (crystalline)                |                     |                          |                  |
| 453 (crystals)                   | 0.25                | 3.99                     | 30               |
| <sup>b</sup> 472 (aggregates)    | 0.25                | 1.42                     | 31               |
| 445                              | 0.24                | -                        | 32               |

<sup>a</sup> solid, <sup>b</sup> in THF/water with 90% water fraction, - not reported.

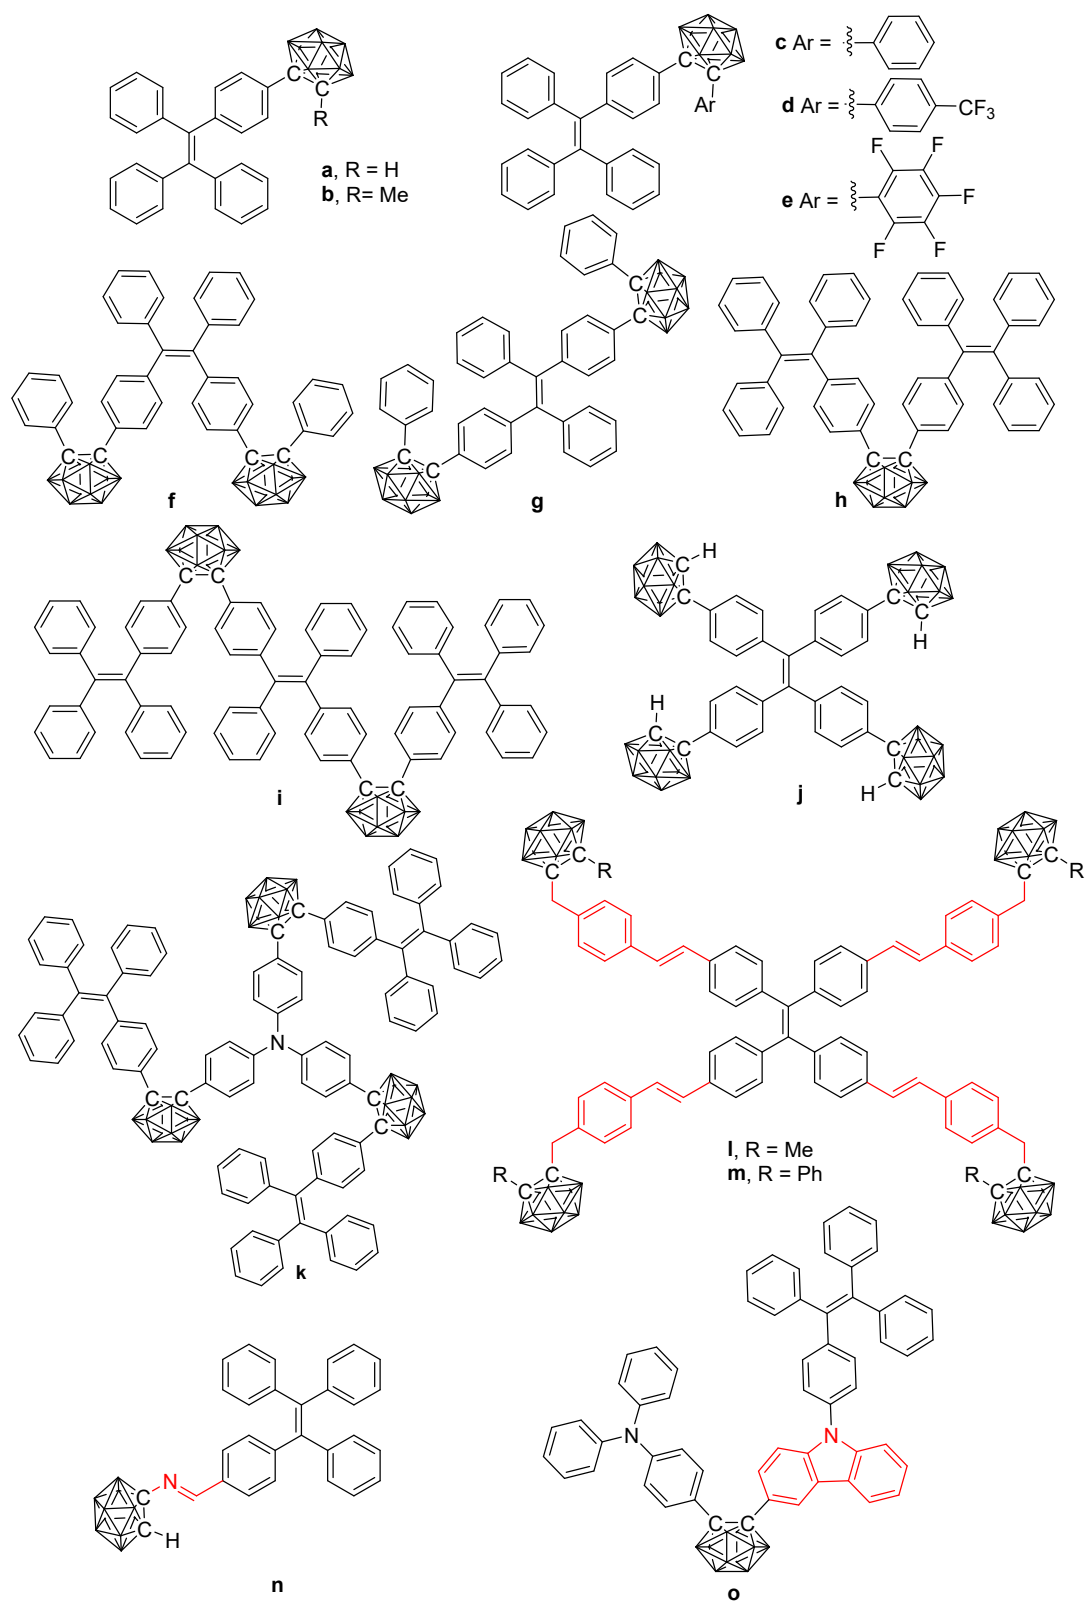

**Scheme S1** Molecular structures of reported *o*-carborane-TPE compounds

**Table S2.** Synthesis and photophysical data for reported *o*-carborane-TPE compounds

| Comp.    | linker                                                                              | synthesis                                                                                                                                                  | <sup>a</sup> $\lambda_{em}$ (nm)                               | <sup>a</sup> $\tau$ (ns)                                         | <sup>a</sup> $\Phi$                                              | <sup>c</sup> ref. |
|----------|-------------------------------------------------------------------------------------|------------------------------------------------------------------------------------------------------------------------------------------------------------|----------------------------------------------------------------|------------------------------------------------------------------|------------------------------------------------------------------|-------------------|
| <b>a</b> | -                                                                                   | alkynyl-TPE +<br>B <sub>10</sub> H <sub>12</sub> (SEt <sub>2</sub> ) <sub>2</sub>                                                                          | 452                                                            | 7.21                                                             | 0.18                                                             | 28                |
| <b>b</b> | -                                                                                   | alkynyl-TPE +<br>B <sub>10</sub> H <sub>12</sub> (SEt <sub>2</sub> ) <sub>2</sub>                                                                          | 533                                                            | 4.81                                                             | 0.58                                                             | 28                |
| <b>c</b> | -                                                                                   | alkynyl-TPE +<br>B <sub>10</sub> H <sub>12</sub> (SEt <sub>2</sub> ) <sub>2</sub>                                                                          | 553<br>(powder) <sup>28</sup> ,<br>522 (crystal) <sup>37</sup> | 7.30<br>(powder) <sup>28</sup> ,<br>4.85 (crystal) <sup>37</sup> | 0.63<br>(powder) <sup>28</sup> ,<br>0.95 (crystal) <sup>37</sup> | 28, 37            |
| <b>d</b> | -                                                                                   | alkynyl-TPE +<br>B <sub>10</sub> H <sub>12</sub> (NCCH <sub>3</sub> ) <sub>2</sub>                                                                         | 597                                                            | 9.02                                                             | 0.91                                                             | 38                |
| <b>e</b> | -                                                                                   | alkynyl-TPE +<br>B <sub>10</sub> H <sub>12</sub> (NCCH <sub>3</sub> ) <sub>2</sub>                                                                         | 678                                                            | 7.04                                                             | 0.59                                                             | 38                |
| <b>f</b> | -                                                                                   | alkynyl-TPE +<br>B <sub>10</sub> H <sub>12</sub> (NCCH <sub>3</sub> ) <sub>2</sub>                                                                         | 528                                                            | 6.23                                                             | 0.99                                                             | 39                |
| <b>g</b> | -                                                                                   | alkynyl-TPE +<br>B <sub>10</sub> H <sub>12</sub> (NCCH <sub>3</sub> ) <sub>2</sub>                                                                         | 534 <sup>37</sup> , 533 <sup>39</sup>                          | 5.56 <sup>37</sup> , 5.95 <sup>39</sup>                          | 0.90 <sup>37</sup> , 0.90 <sup>39</sup>                          | 37, 39            |
| <b>h</b> | -                                                                                   | alkynyl-TPE +<br>B <sub>10</sub> H <sub>12</sub> (SEt <sub>2</sub> ) <sub>2</sub>                                                                          | 560 (powder)                                                   | 11.9 (powder)                                                    | 0.55 (powder)                                                    | 40                |
| <b>i</b> | -                                                                                   | alkynyl-TPE +<br>B <sub>10</sub> H <sub>12</sub> (NCCH <sub>3</sub> ) <sub>2</sub>                                                                         | 565                                                            | 5.48                                                             | 0.68                                                             | 41                |
| <b>j</b> | -                                                                                   | alkynyl-TPE +<br>B <sub>10</sub> H <sub>12</sub> (SEt <sub>2</sub> ) <sub>2</sub>                                                                          | 452                                                            | 2.96                                                             | 0.34                                                             | 28                |
| <b>k</b> | -                                                                                   | alkynyl-TPE +<br>B <sub>10</sub> H <sub>12</sub> (NCCH <sub>3</sub> ) <sub>2</sub>                                                                         | 563                                                            | -                                                                | 0.62                                                             | 42                |
| <b>l</b> |  | (Pd-cat.) styryl-<br>C <sub>2</sub> B <sub>10</sub> + Br-TPE                                                                                               | 559                                                            | 1.34 <sup>b</sup>                                                | 0.51 <sup>b</sup>                                                | 43                |
| <b>m</b> |  | (Pd-cat.) styryl-<br>C <sub>2</sub> B <sub>10</sub> + Br-TPE                                                                                               | 561                                                            | 1.05 <sup>b</sup>                                                | 0.56 <sup>b</sup>                                                | 43                |
| <b>n</b> | C=N                                                                                 | C <sub>2</sub> B <sub>10</sub> -NH <sub>2</sub> +<br>TPE-CHO                                                                                               | 480 (crystal),<br>483 (powder)                                 | -                                                                | 0.99 (crystal)                                                   | 44                |
| <b>o</b> |  | 1) alkynyl-9H-<br>carbazole +<br>B <sub>10</sub> H <sub>12</sub> (SEt <sub>2</sub> ) <sub>2</sub><br>2) (Pd-cat.) Br-<br>TPE + carbazole<br>(C-N coupling) | 608                                                            | 9.1                                                              | 0.99                                                             | 45                |

<sup>a</sup> solid, <sup>b</sup> THF/H<sub>2</sub>O, 1:1000, <sup>c</sup> ref. in the text, - no linker or not reported.

**Table S3.** Crystal data and structure refinement for **1** and **2**

| compounds                                   | <b>1</b>                                                          | <b>2</b>                                                      |
|---------------------------------------------|-------------------------------------------------------------------|---------------------------------------------------------------|
| Empirical formula                           | C <sub>29</sub> H <sub>32</sub> B <sub>10</sub> O <sub>0.97</sub> | C <sub>29</sub> H <sub>32</sub> B <sub>10</sub> OF            |
| Formula weight                              | 504.25                                                            | 522.64                                                        |
| Temperature/K                               | 293(2)                                                            | 293(2)                                                        |
| Crystal system                              | triclinic                                                         | triclinic                                                     |
| Space group                                 | P-1                                                               | P-1                                                           |
| a/Å                                         | 9.9704(8)                                                         | 9.8582(6)                                                     |
| b/Å                                         | 11.7142(7)                                                        | 11.8389(6)                                                    |
| c/Å                                         | 13.6657(10)                                                       | 13.8893(8)                                                    |
| $\alpha$ /°                                 | 78.019(6)                                                         | 77.753(4)                                                     |
| $\beta$ /°                                  | 88.318(6)                                                         | 88.625(5)                                                     |
| $\gamma$ /°                                 | 69.186(7)                                                         | 70.879(5)                                                     |
| Volume/Å <sup>3</sup>                       | 1457.70(18)                                                       | 1494.92(15)                                                   |
| Z                                           | 2                                                                 | 2                                                             |
| $\rho_{\text{calc}}$ /g/cm <sup>3</sup>     | 1.149                                                             | 1.161                                                         |
| $\mu$ /mm <sup>-1</sup>                     | 0.062                                                             | 0.067                                                         |
| F(000)                                      | 528                                                               | 544                                                           |
| Crystal size/mm <sup>3</sup>                | 0.4 × 0.4 × 0.4                                                   | 0.4 × 0.4 × 0.3                                               |
| Radiation                                   | MoK $\alpha$ ( $\lambda$ = 0.71073)                               | MoK $\alpha$ ( $\lambda$ = 0.71073)                           |
| 2 $\theta$ range for data collection/°      | 6.74 to 52.74                                                     | 6.01 to 50.7                                                  |
| Index ranges                                | -12 ≤ h ≤ 12, -14 ≤ k ≤ 14, -17 ≤ l ≤ 17                          | -11 ≤ h ≤ 11, -14 ≤ k ≤ 14, -16 ≤ l ≤ 16                      |
| Reflections collected                       | 17889                                                             | 16950                                                         |
| Independent reflections                     | 5943 [R <sub>int</sub> = 0.0265, R <sub>sigma</sub> = 0.0308]     | 5470 [R <sub>int</sub> = 0.0287, R <sub>sigma</sub> = 0.0311] |
| Data/restraints/parameters                  | 5943/5/373                                                        | 5470/0/370                                                    |
| Goodness-of-fit on F <sup>2</sup>           | 1.056                                                             | 1.046                                                         |
| Final R indexes [I ≥ 2 $\sigma$ (I)]        | R <sub>1</sub> = 0.0560, wR <sub>2</sub> = 0.1448                 | R <sub>1</sub> = 0.0657, wR <sub>2</sub> = 0.1809             |
| Final R indexes [all data]                  | R <sub>1</sub> = 0.0823, wR <sub>2</sub> = 0.1636                 | R <sub>1</sub> = 0.0917, wR <sub>2</sub> = 0.2021             |
| Largest diff. peak/hole / e Å <sup>-3</sup> | 0.26/-0.36                                                        | 0.76/-0.25                                                    |
| CCDC number                                 | 1901606                                                           | 2216881                                                       |



**Table S4.** Selected bond lengths and angles, and torsion angles for **1** and **2**

| Compounds | bond lengths (Å) |       | angles [°]  |        | torsion angles [°] |         |
|-----------|------------------|-------|-------------|--------|--------------------|---------|
| <b>1</b>  | C1-C2            | 1.673 | C1-C2-C3    | 120.60 | C1-C2-C3-C4        | 8.59    |
|           | C2-C3            | 1.550 | C2-C3-C4    | 112.86 | C1-C2-C3-O1        | -115.37 |
|           | C3-C4            | 1.505 | C2-C3-O1    | 119.14 | C1-C2-C3-O1'       | 135.66  |
|           | C3-O1            | 1.211 | C2-C3-O1'   | 110.47 | C2-C3-C4-C5        | 90.74   |
|           | C3-O1'           | 1.406 | O1-C3-O1'   | 95.49  | C10-C11-C18-C21    | -47.06  |
|           | C10-C11          | 1.350 | C10-C11-C18 | 123.57 | C10-C11-C24-C25    | -52.64  |
|           | C10-C9           | 1.497 | C10-C11-C24 | 121.42 | C11-C10-C9-C6      | -62.67  |
|           | C10-C12          | 1.492 | C11-C10-C12 | 124.25 | C11-C10-C12-C15    | -49.62  |
|           | C11-C18          | 1.492 |             |        |                    |         |
|           | C11-C24          | 1.495 |             |        |                    |         |
| <b>2</b>  | C28-C29          | 1.659 | C27-C28-C29 | 120.10 | C29-C28-C27-C24    | -89.43  |
|           | C27-C28          | 1.555 | C28-C27-C24 | 112.73 | C29-C28-C27-O1     | 30.74   |
|           | C24-C27          | 1.511 | C28-C27-O1  | 109.30 | C28-C27-C24-C25    | -89.96  |
|           | C27-O1           | 1.429 | C8-C7-C6    | 122.50 | C8-C7-C6-C5        | 48.82   |
|           | C7-C8            | 1.354 | C8-C7-C15   | 122.30 | C8-C7-C15-C20      | 49.62   |
|           | C8-C21           | 1.500 | C7-C8-C9    | 123.60 | C7-C8-C21-C26      | 56.16   |
|           | C8-C9            | 1.488 |             |        | C7-C8-C9-C10       | 49.83   |
|           | C7-C6            | 1.492 |             |        |                    |         |
|           | C7-C15           | 1.488 |             |        |                    |         |
|           | C18-F1           | 1.346 |             |        |                    |         |

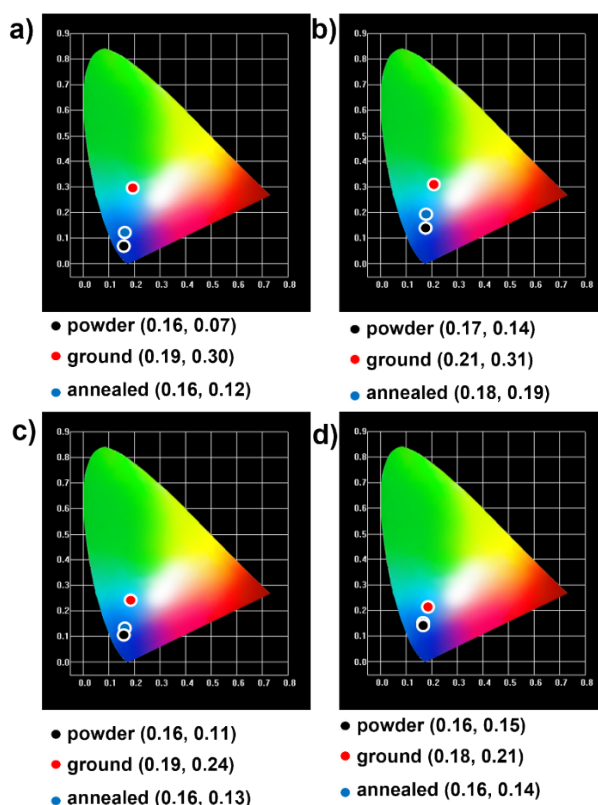**Fig. S1** CIE 1931 chromaticity coordinates of **1** (a), **2** (b), **3** (c), **4** (d)

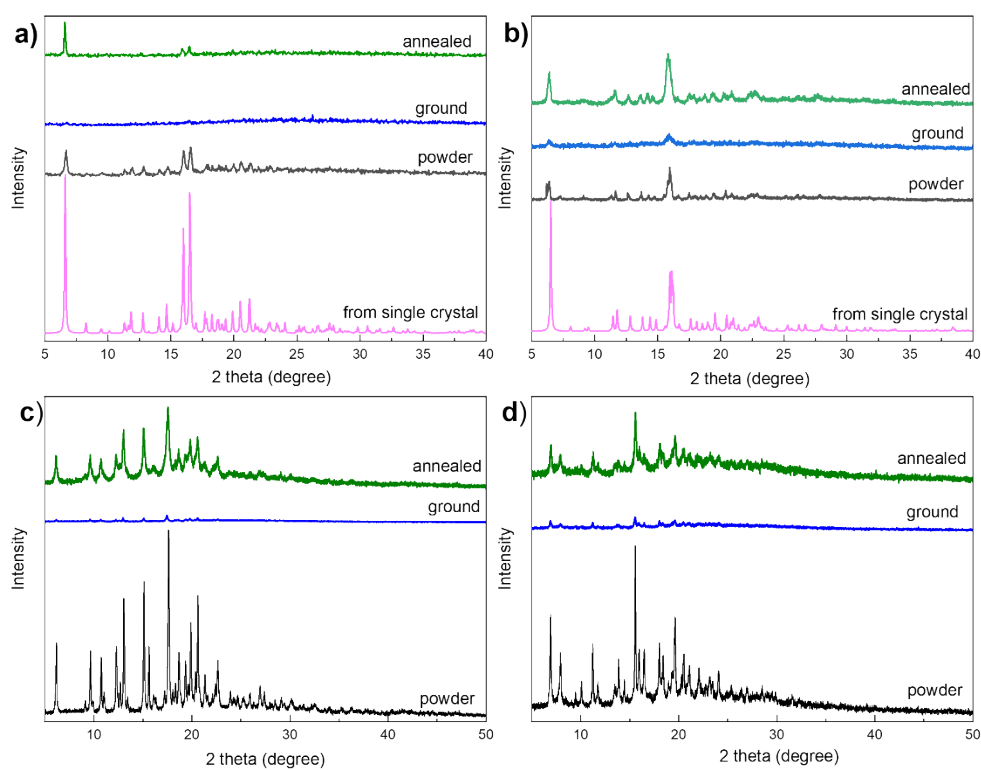

**Fig. S2** PXRD patterns of **1** (a), **2** (b), **3** (c), **4** (d)

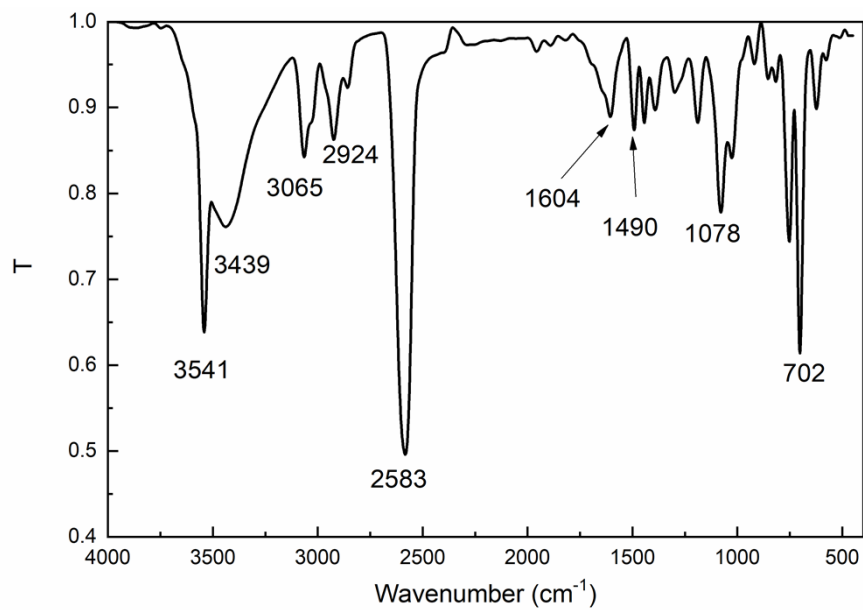

**Fig. S3.** FT-IR spectrum of **1** (KBr pellet)

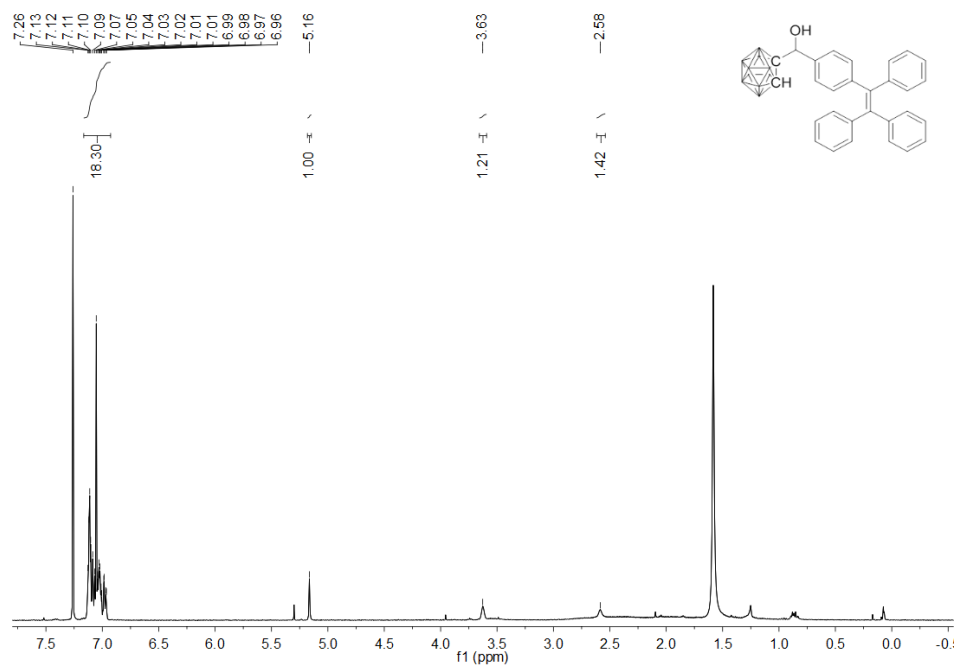

Fig. S4. <sup>1</sup>H-NMR spectrum of 1 in CDCl<sub>3</sub>

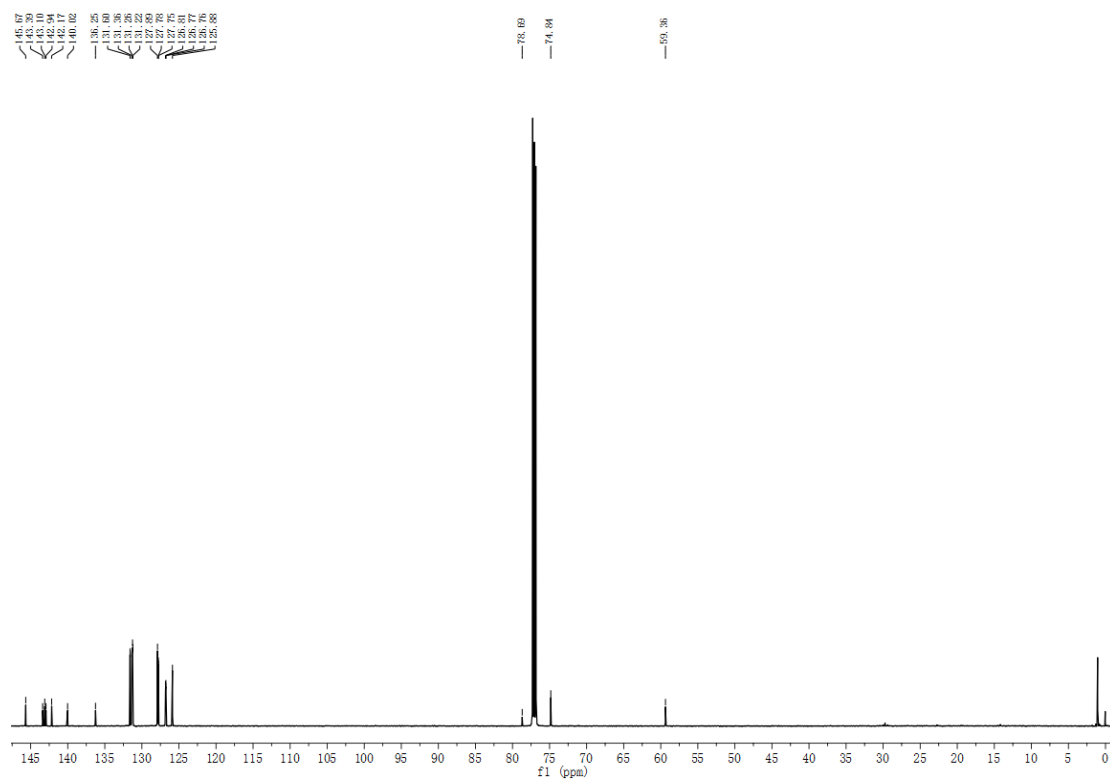

Fig. S5. <sup>13</sup>C-NMR spectrum of 1 in CDCl<sub>3</sub>

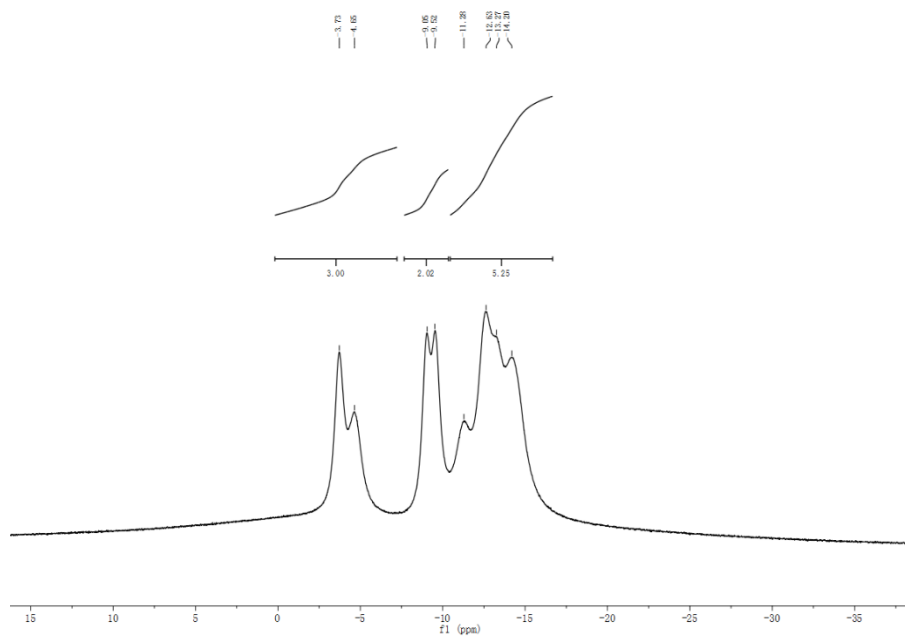

**Fig. S6.**  $^{11}\text{B}\{^1\text{H}\}$ -NMR spectrum of **1** in  $\text{CH}_2\text{Cl}_2$

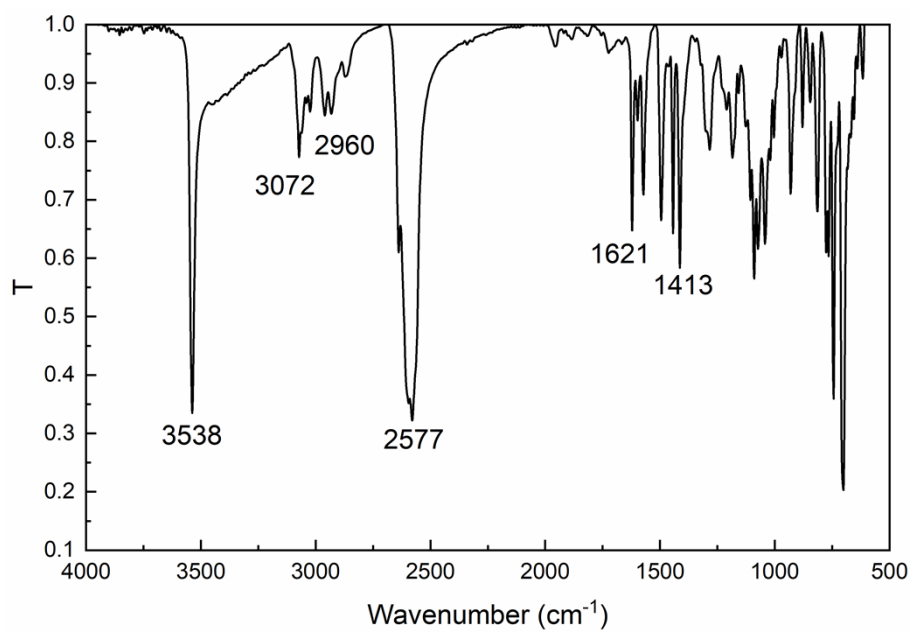

**Fig. S7.** FT-IR spectrum of **2** (KBr pellet)



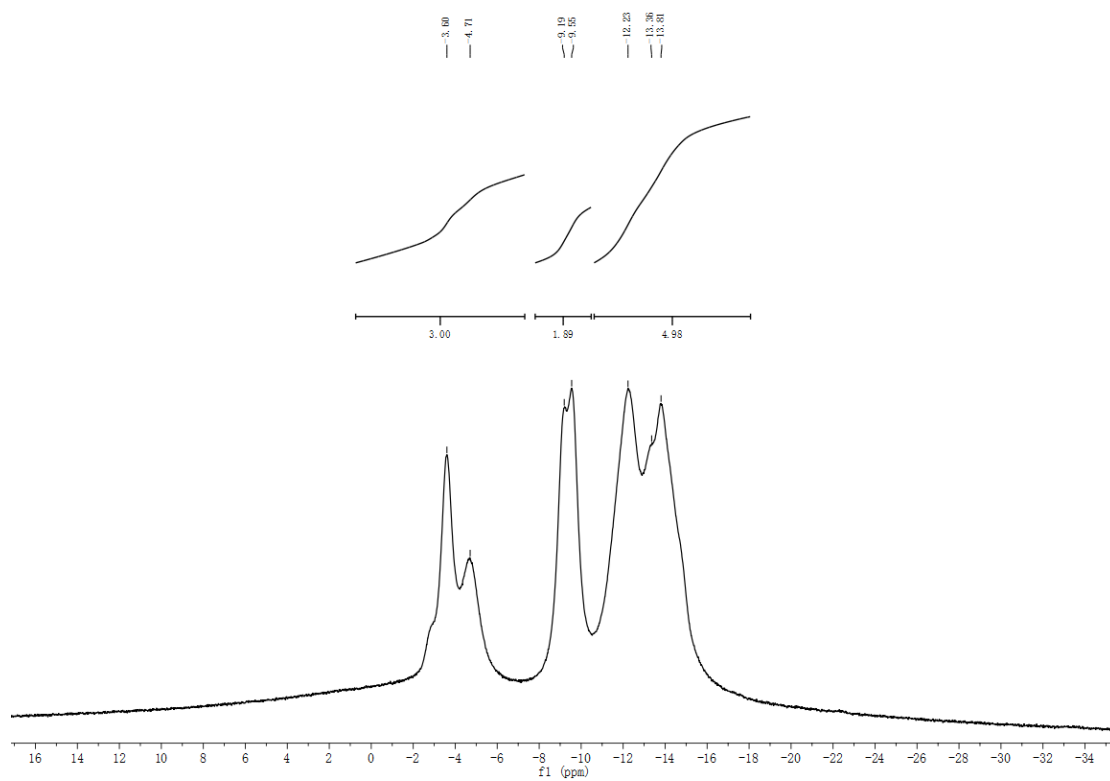

**Fig. S10.**  $^{11}\text{B}\{^1\text{H}\}$ -NMR spectrum of **2** in  $\text{CH}_2\text{Cl}_2$

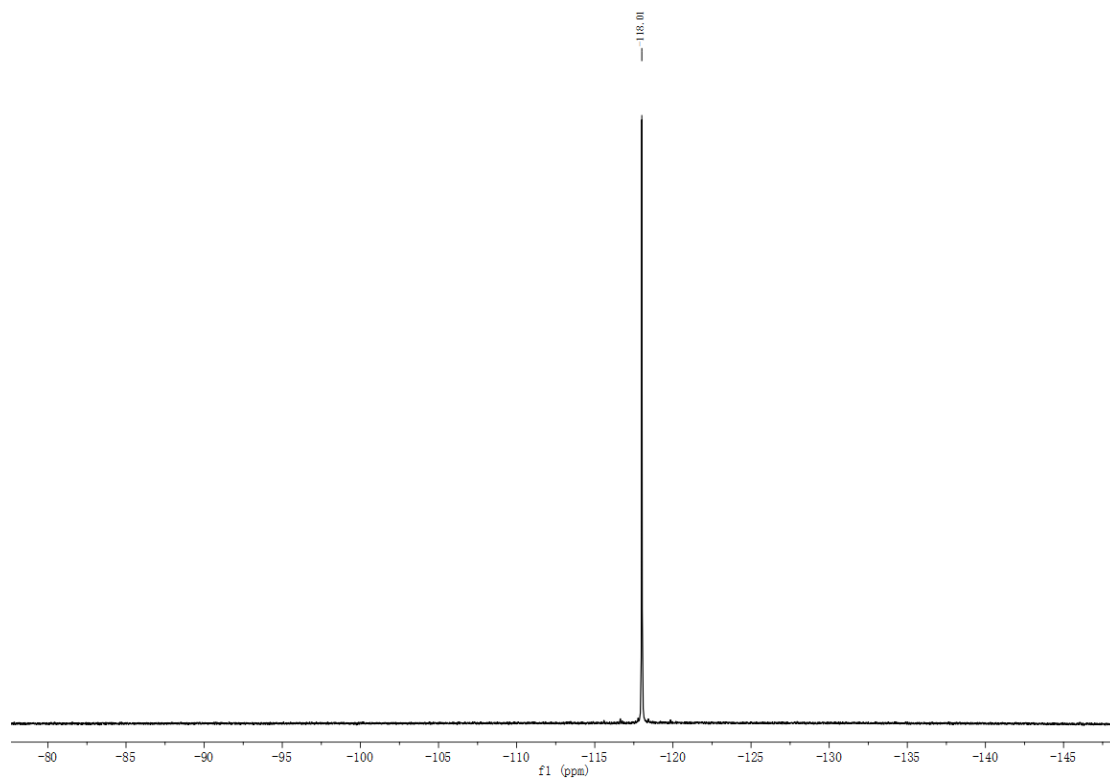

**Fig. S11.**  $^{19}\text{F}$ -NMR spectrum of **2** in  $\text{CH}_2\text{Cl}_2$

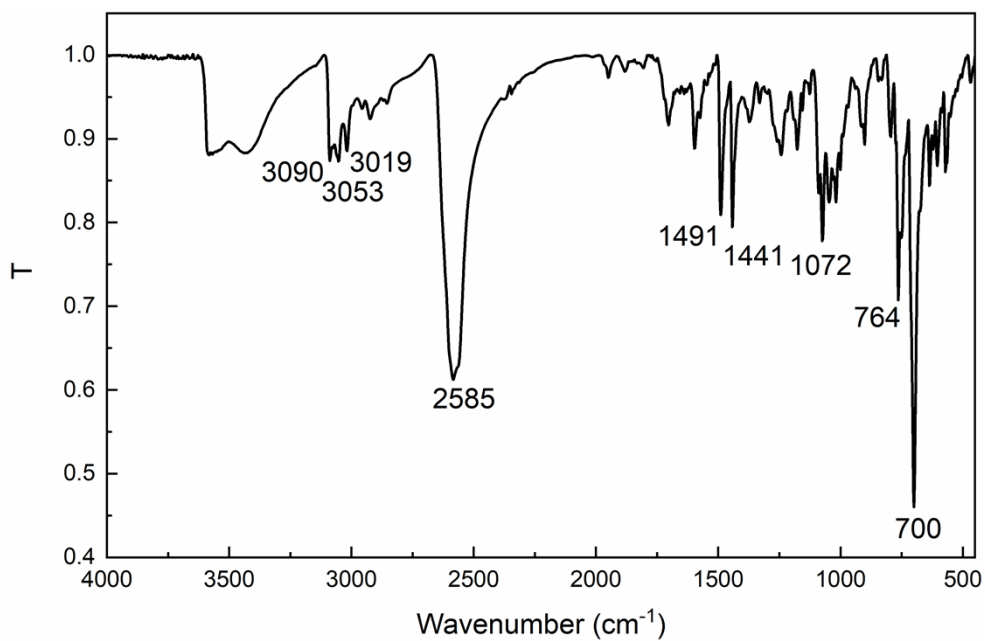

Fig. S12. FT-IR spectrum of 3 (KBr pellet)

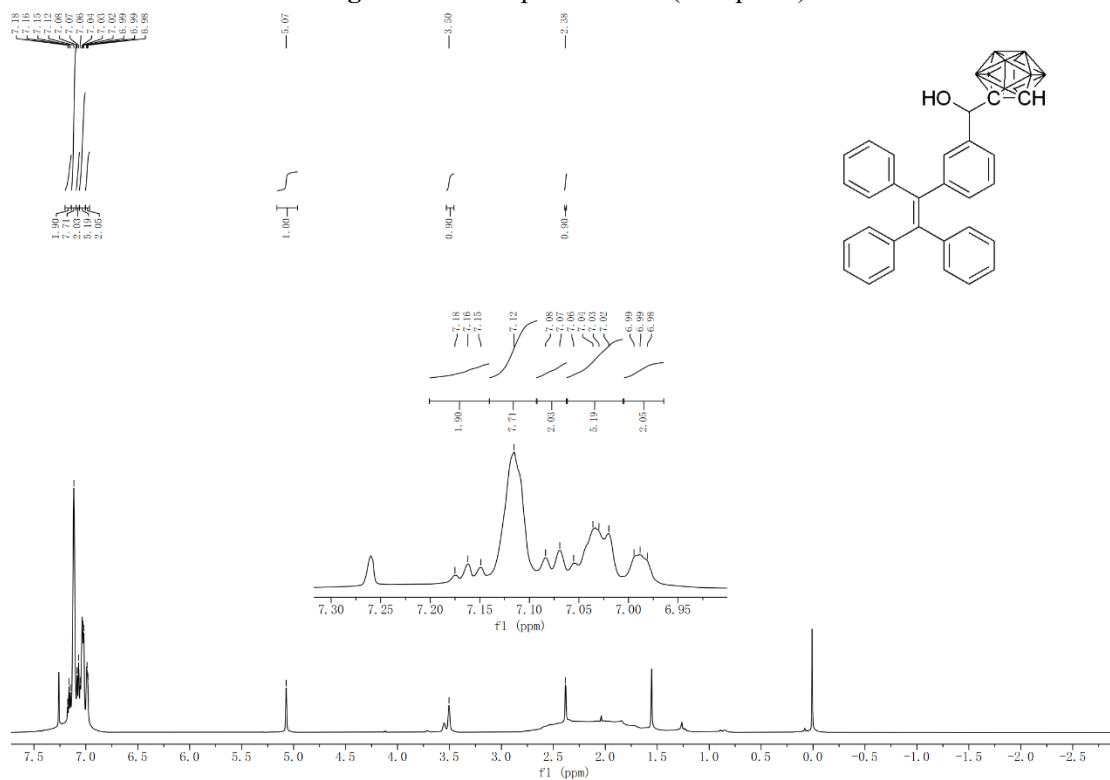

Fig. S13. <sup>1</sup>H-NMR spectrum of 3 in CDCl<sub>3</sub>

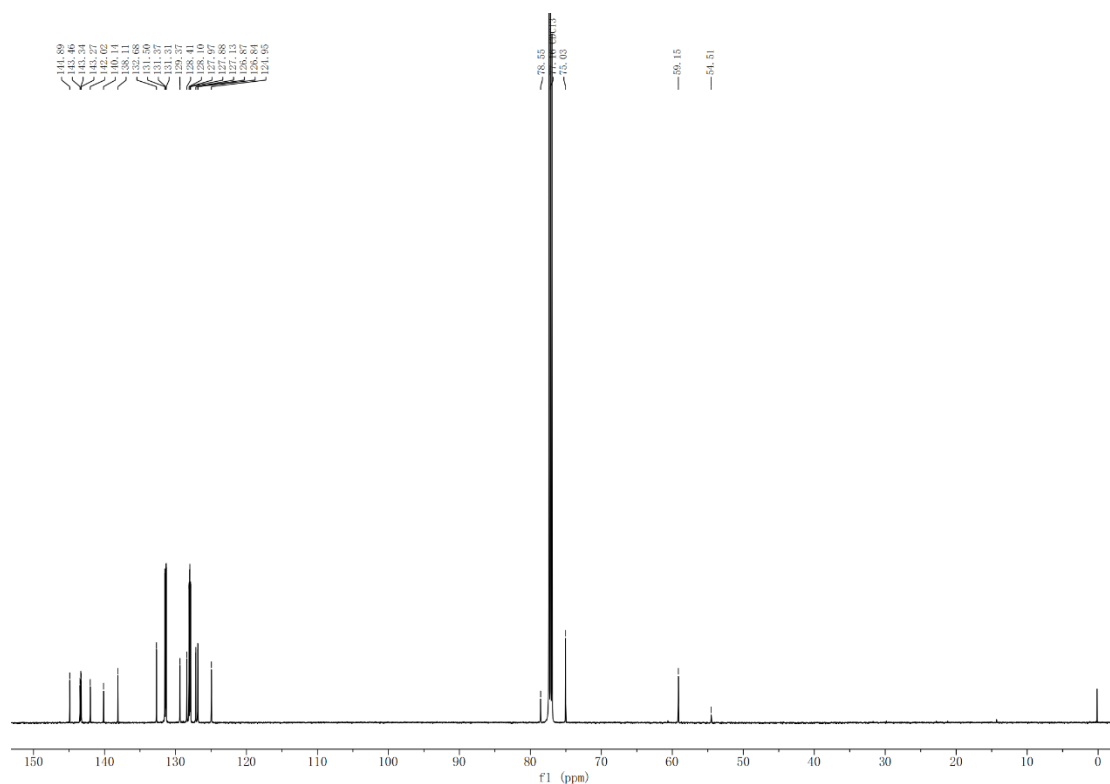

Fig. S14.  $^{13}\text{C}$ -NMR spectrum of **3** in  $\text{CDCl}_3$

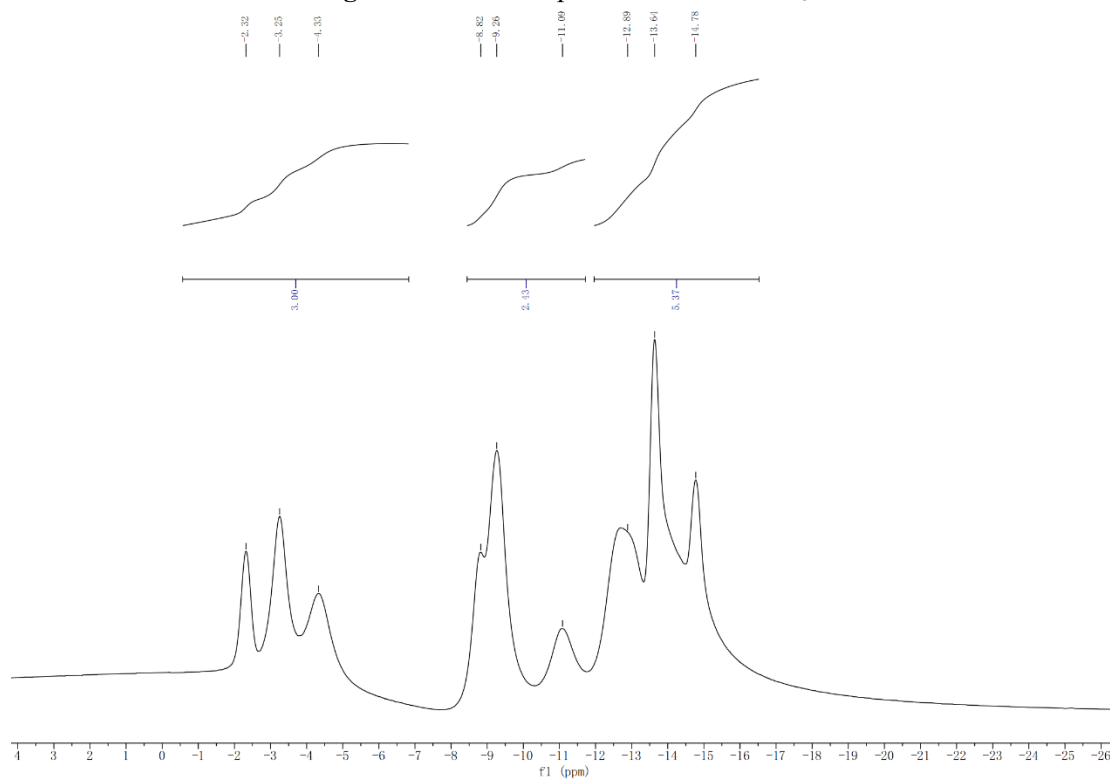

Fig. S15.  $^1\text{H}\{^1\text{H}\}$ -NMR spectrum of **3** in  $\text{CDCl}_3$



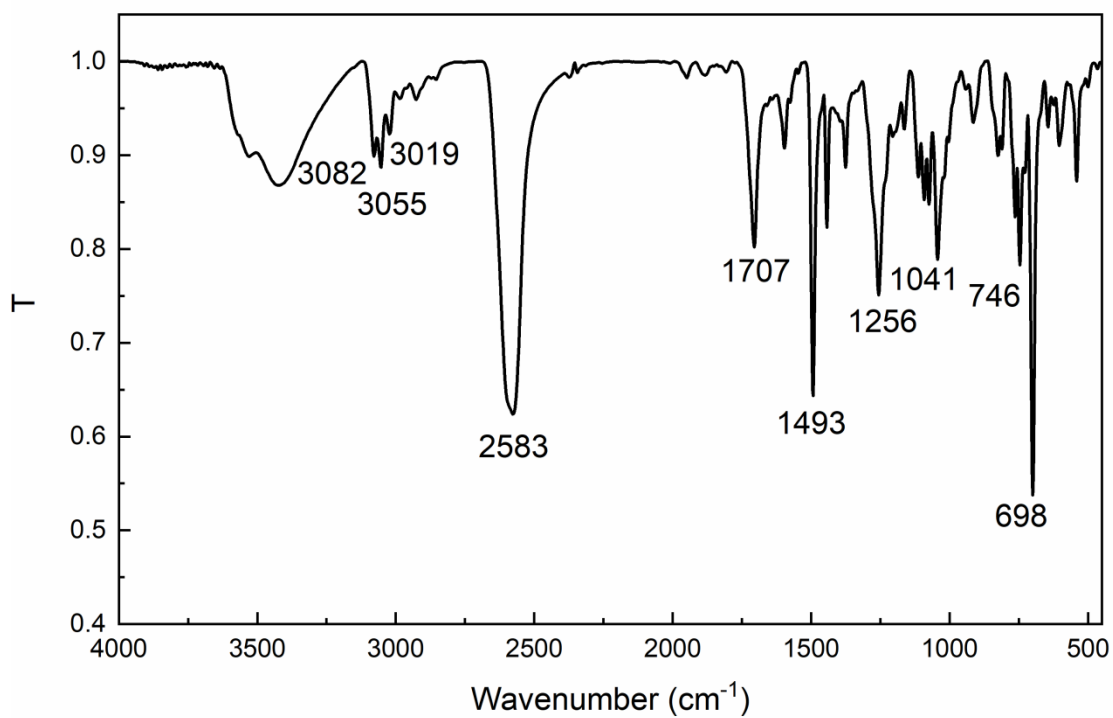

Fig. S16. FT-IR spectrum of 4 (KBr pellet)

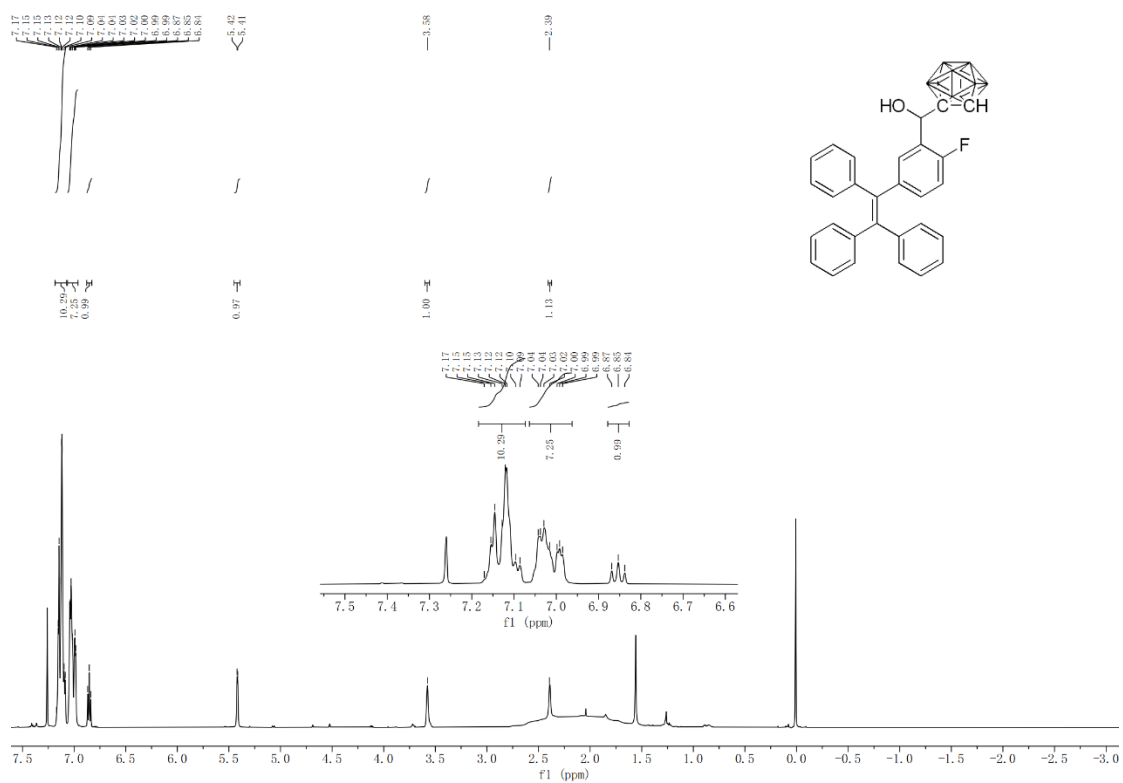

Fig. S17. <sup>1</sup>H-NMR spectrum of 4 in CDCl<sub>3</sub>

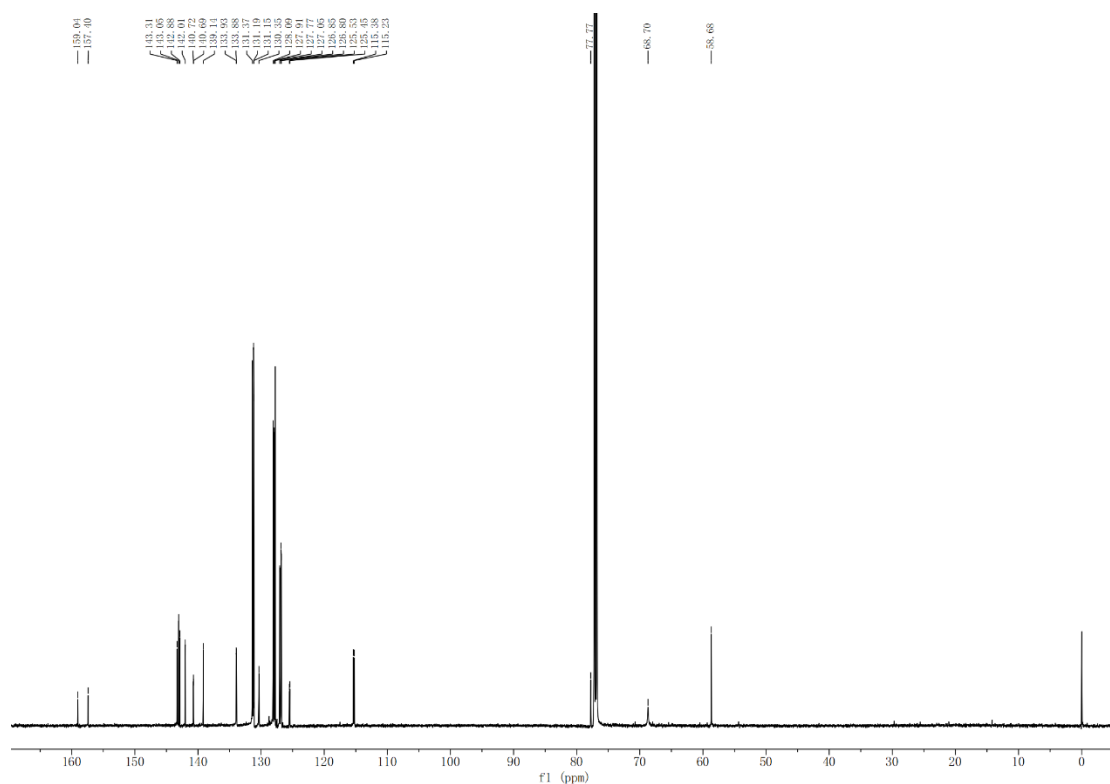

**Fig. S18.**  $^{13}\text{C}$ -NMR spectrum of **4** in  $\text{CDCl}_3$

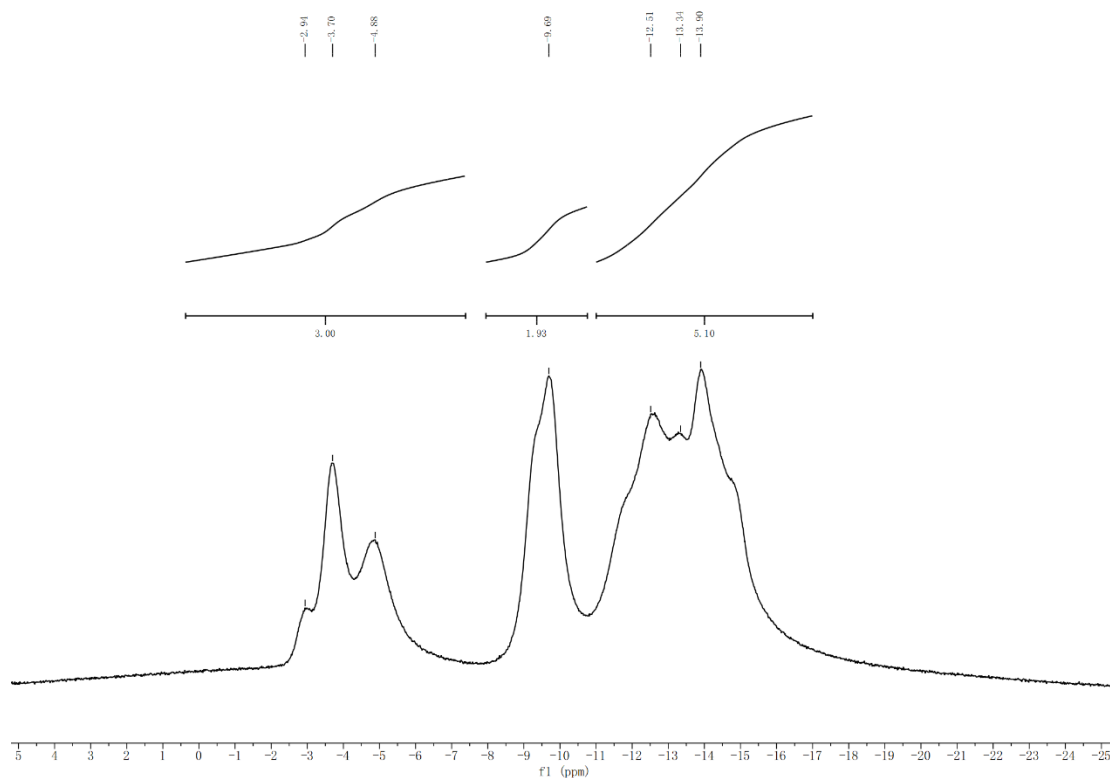

**Fig. S19.**  $^{11}\text{B}\{^1\text{H}\}$ -NMR spectrum of **4** in  $\text{CH}_2\text{Cl}_2$

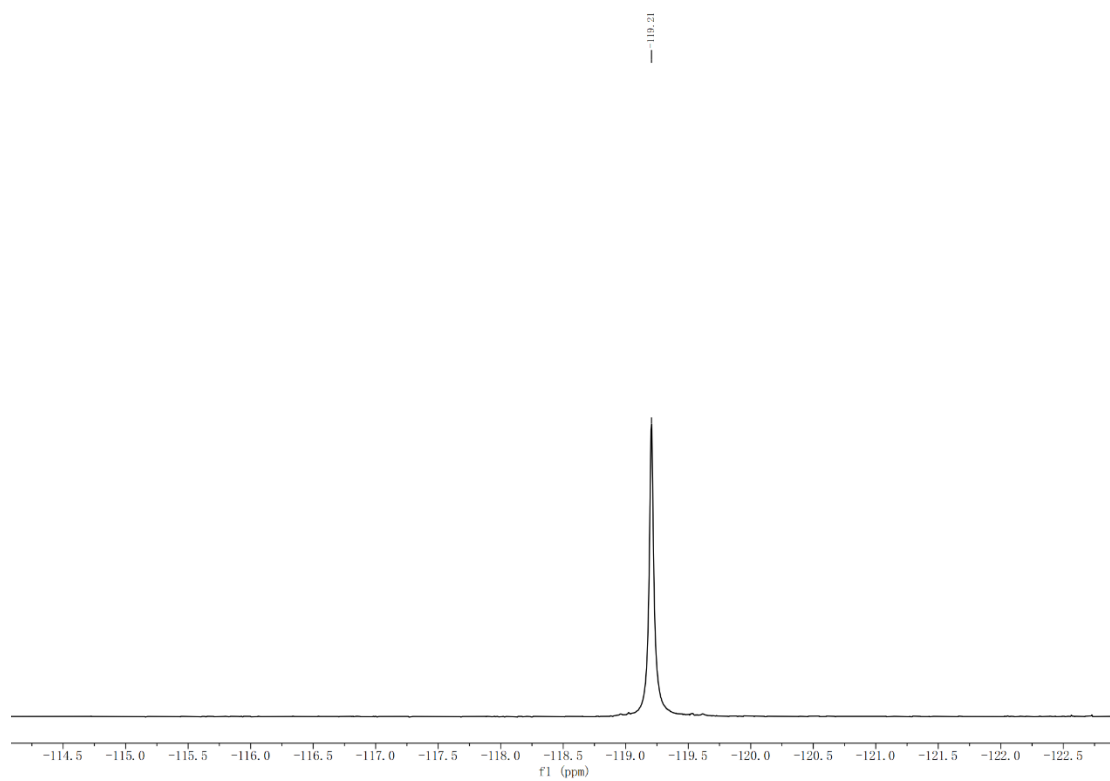

**Fig. S20.**  $^{19}\text{F}$ -NMR spectrum of **4** in  $\text{CH}_2\text{Cl}_2$
